# Supplementary material
Source: Springer Nature journal article supplement (https://www.springermedizin.de/resource/supplementary/12943_2002_10_MOESM8_ESM.pdf/9553258)

Gleevec

0

2

4

( $\mu$ M)

176 —

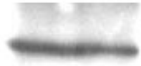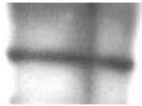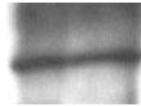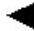

PDGFR  $\alpha$

Supplement: MOESM8 [file 9553258]
